# Supplementary material
Source: PubMed Central journal article supplement (PMC9723496)
Supplement: glab371_suppl_supplementary_tables.pdf [file glab371_suppl_supplementary_tables.pdf]

**Supplementary Table S1. Unadjusted associations of potential protective and risk factors with change in loneliness from pre-COVID-19 pandemic to during the pandemic, and with loneliness during the COVID-19 pandemic**

| Characteristic                                                                           | Associations with change in loneliness from pre-pandemic to intra-pandemic |         | Associations with loneliness during pandemic |         |
|------------------------------------------------------------------------------------------|----------------------------------------------------------------------------|---------|----------------------------------------------|---------|
|                                                                                          | Estimate (95% CI)                                                          | P-value | Estimate (95% CI)                            | P-value |
| <b>Demographic</b>                                                                       |                                                                            |         |                                              |         |
| Age (continuous, by 5-year increase)                                                     | 0.10 (0.09, 0.12)                                                          | <0.0001 | 0.15 (0.13, 0.16)                            | <0.0001 |
| Age ≥80                                                                                  | 0.20 (0.16, 0.23)                                                          | <0.0001 | 0.28 (0.25, 0.32)                            | <0.0001 |
| Race                                                                                     |                                                                            |         |                                              |         |
| White (reference)                                                                        |                                                                            |         |                                              |         |
| American Indian/Alaska Native                                                            | -0.30 (-0.66, 0.06)                                                        | 0.1039  | 0.03 (-0.36, 0.42)                           | 0.8881  |
| Asian/Pacific Islander                                                                   | -0.17 (-0.28, -0.06)                                                       | 0.0024  | -0.28 (-0.40, -0.17)                         | <0.0001 |
| Black/African American                                                                   | -0.26 (-0.34, -0.18)                                                       | <0.0001 | -0.20 (-0.29, -0.12)                         | <0.0001 |
| More than one race                                                                       | 0.07 (-0.09, 0.23)                                                         | 0.3695  | 0.25 (0.08, 0.42)                            | 0.0042  |
| Unknown/Not reported                                                                     | -0.19 (-0.38, -0.01)                                                       | 0.0422  | 0.08 (-0.12, 0.28)                           | 0.4553  |
| Hispanic/Latina ethnicity                                                                | -0.14 (-0.24, -0.04)                                                       | 0.0056  | -0.07 (-0.17, 0.04)                          | 0.2225  |
| Education                                                                                |                                                                            |         |                                              |         |
| College degree or higher (reference)                                                     |                                                                            |         |                                              |         |
| School after high school                                                                 | -0.01 (-0.05, 0.02)                                                        | 0.5146  | 0.05 (0.01, 0.09)                            | 0.0136  |
| High school diploma or less                                                              | -0.02 (-0.07, 0.02)                                                        | 0.3106  | 0.09 (0.03, 0.14)                            | 0.0010  |
| <b>Lifestyle</b>                                                                         |                                                                            |         |                                              |         |
| Walking continuously for at least 5 minutes                                              |                                                                            |         |                                              |         |
| ≤3 times per week (reference)                                                            |                                                                            |         |                                              |         |
| 4 or more times per week                                                                 | -0.11 (-0.14, -0.07)                                                       | <0.0001 | -0.31 (-0.35, -0.27)                         | <0.0001 |
| Alcoholic drinks per week                                                                |                                                                            |         |                                              |         |
| None (reference)                                                                         |                                                                            |         |                                              |         |
| ≤4                                                                                       | -0.06 (-0.09, -0.02)                                                       | 0.0010  | -0.18 (-0.22, -0.14)                         | <0.0001 |
| 5-7                                                                                      | -0.06 (-0.11, -0.01)                                                       | 0.0034  | -0.26 (-0.31, -0.20)                         | <0.0001 |
| >7                                                                                       | -0.04 (-0.13, 0.05)                                                        | 0.3601  | -0.13 (-0.22, -0.03)                         | 0.0104  |
| <b>Life events</b>                                                                       |                                                                            |         |                                              |         |
| Number of stressful life events (0-11, continuous)                                       | 0.14 (0.13, 0.16)                                                          | <0.0001 | 0.29 (0.28, 0.31)                            | <0.0001 |
| Death or serious illness of close friend or family member (other than spouse or partner) | 0.13 (0.10, 0.16)                                                          | <0.0001 | 0.21 (0.17, 0.25)                            | <0.0001 |
| Death of a pet                                                                           | -0.01 (-0.08, 0.05)                                                        | 0.6549  | 0.10 (0.03, 0.17)                            | 0.0057  |
| Death of a spouse or partner                                                             | 0.73 (0.65, 0.81)                                                          | <0.0001 | 0.79 (0.70, 0.87)                            | <0.0001 |
| Optimism (continuous)                                                                    | -0.053 (-0.058, -0.049)                                                    | <0.0001 | -0.143 (-0.147, -0.138)                      | <0.0001 |
| Purpose in life (continuous)                                                             | -0.051 (-0.055, -0.048)                                                    | <0.0001 | -0.110 (-0.114, -0.107)                      | <0.0001 |
| <b>Medical history</b>                                                                   |                                                                            |         |                                              |         |
| CVD                                                                                      | 0.16 (0.11, 0.21)                                                          | <0.0001 | 0.29 (0.24, 0.35)                            | <0.0001 |
| Cancer                                                                                   | 0.03 (-0.01, 0.07)                                                         | 0.1414  | 0.06 (0.02, 0.10)                            | 0.0027  |

|                                                   |                   |         |                   |         |
|---------------------------------------------------|-------------------|---------|-------------------|---------|
| Vascular risk factors score (0-4, continuous)     | 0.03 (0.01, 0.05) | 0.0011  | 0.12 (0.10, 0.15) | <0.0001 |
| History of depression (DIS)                       | 0.72 (0.64, 0.80) | <0.0001 | 1.85 (1.77, 1.93) | <0.0001 |
| <b>Social connection variables</b>                |                   |         |                   |         |
| Lives alone                                       | 0.20 (0.16, 0.23) | <0.0001 | 0.57 (0.53, 0.60) | <0.0001 |
| Change in living arrangement due to pandemic      | 0.26 (0.19, 0.32) | <0.0001 | 0.41 (0.34, 0.48) | <0.0001 |
| Living situation restrictions due to pandemic     | 0.25 (0.20, 0.29) | <0.0001 | 0.44 (0.39, 0.49) | <0.0001 |
| <b>Communication with others outside the home</b> |                   |         |                   |         |
| 1-2 times per week or less                        | 0.13 (0.09, 0.18) | <0.0001 | 0.43 (0.39, 0.48) | <0.0001 |
| Less often now than before the pandemic           | 0.20 (0.16, 0.23) | <0.0001 | 0.29 (0.25, 0.33) | <0.0001 |
| No in-person communication                        | 0.08 (0.04, 0.11) | <0.0001 | 0.20 (0.17, 0.24) | <0.0001 |

**Footnote.** Estimates are the beta coefficients (slope) from unadjusted linear regressions where change in loneliness score and loneliness are modeled as a function of each characteristic. Loneliness scores range from 3 to 9, and changes in pre-pandemic to intra-pandemic loneliness scores range from -6 to 6.

P-value is for the Wald test of significance for each characteristic

**Supplementary Table S2. Multivariable associations between changes in loneliness and social connection, clinically significant depressive symptoms, and moderate to severe anxiety during the COVID-19 pandemic**

| Characteristic                                                          | CES-D Depression 6-item scale score $\geq 5$ |                   | PROMIS 4-item anxiety score $\geq 60$ |                   |
|-------------------------------------------------------------------------|----------------------------------------------|-------------------|---------------------------------------|-------------------|
|                                                                         | Odds Ratio (95% CI)                          | P-value           | Odds Ratio (95% CI)                   | P-value           |
| Change in loneliness score, continuous (by increase of 3)               | 2.37 (2.18, 2.57)                            | <b>&lt;0.0001</b> | 1.55 (1.42, 1.70)                     | <b>&lt;0.0001</b> |
| Lives alone                                                             | 0.98 (0.91, 1.06)                            | 0.6092            | 0.96 (0.88, 1.05)                     | 0.3753            |
| Changes in living arrangement due to the COVID-19 pandemic              | 1.20 (1.02, 1.40)                            | 0.0245            | 1.38 (1.16, 1.63)                     | 0.0002            |
| Living situation restrictions due to the COVID-19 pandemic              | 1.14 (1.02, 1.28)                            | 0.0222            | 1.16 (1.02, 1.32)                     | 0.0288            |
| Communication with others outside the home                              |                                              |                   |                                       |                   |
| Every day or several times per week                                     | Reference                                    |                   | Reference                             |                   |
| 1-2 times per week or less                                              | 1.23 (1.11, 1.36)                            | <b>&lt;0.0001</b> | 1.10 (0.98, 1.24)                     | 0.1114            |
| Frequency of communication now, compared to before the pandemic         |                                              |                   |                                       |                   |
| About the same or more often                                            | Reference                                    |                   | Reference                             |                   |
| Less often than before                                                  | 1.14 (1.05, 1.24)                            | 0.0024            | 1.25 (1.13, 1.38)                     | <b>&lt;0.0001</b> |
| Ways of staying in touch with others                                    |                                              |                   |                                       |                   |
| Speaking in person                                                      | Reference                                    |                   | Reference                             |                   |
| Telephone, video, social media, email or postal mail, but not in person | 1.24 (1.14, 1.34)                            | <b>&lt;0.0001</b> | 1.32 (1.20, 1.46)                     | <b>&lt;0.0001</b> |

**Footnote.** Odds ratio estimates are from logistic regression models where clinically significant depressive symptoms (CES-D  $\geq 5$ ) and moderate to severe anxiety (PROMIS T-score  $\geq 60$ ) are separately modeled as functions of change in loneliness score (intra-pandemic minus pre-pandemic) and social connection variables. Models include all variables shown in the table and are adjusted for sociodemographic factors (age, education, race, and ethnicity), lifestyle factors (physical activity, alcohol intake, number of stressful life events), and medical history (CVD history, cancer history, vascular factors risk score, past history of depression).

Center for Epidemiologic Studies Depression Scale (CES-D) ranges from 0 to 18 ( $\geq 5$  considered to have clinically significant depressive symptoms).

PROMIS anxiety T-score ranges from 40.3 to 81.6. General population mean is 50 (SD=10), with scores  $\geq 60$  interpreted as moderate to severe anxiety.

**Supplementary Table S3: Associations between change in loneliness and mental health measures, based on potential effect modifying factors**

| Subgroups                                                               | Perceived stress   |                      | Depressive symptoms (CES-D) |                      | Anxiety (PROMIS 4 items) |                      |
|-------------------------------------------------------------------------|--------------------|----------------------|-----------------------------|----------------------|--------------------------|----------------------|
|                                                                         | Estimate (95% CI)  | p-value, Interaction | Estimate (95% CI)           | p-value, Interaction | Estimate (95% CI)        | p-value, Interaction |
| Age                                                                     |                    |                      |                             |                      |                          |                      |
| <70                                                                     | 0.19 (-0.32, 0.70) | 0.0239               | 0.44 (0.05, 0.84)           | 0.2959               | 0.78 (-0.61, 2.17)       | 0.1410               |
| 70-74                                                                   | 0.48 (0.30, 0.65)  |                      | 1.04 (0.90, 1.17)           |                      | 1.77 (1.30, 2.24)        |                      |
| 75-79                                                                   | 0.57 (0.41, 0.73)  |                      | 1.08 (0.96, 1.20)           |                      | 1.68 (1.26, 2.10)        |                      |
| 80-89                                                                   | 0.61 (0.46, 0.76)  |                      | 1.02 (0.90, 1.13)           |                      | 1.88 (1.47, 2.28)        |                      |
| ≥90                                                                     | 1.02 (0.51, 1.53)  |                      | 1.11 (0.72, 1.49)           |                      | 2.89 (1.57, 4.20)        |                      |
| Race                                                                    |                    |                      |                             |                      |                          |                      |
| White                                                                   | 0.58 (0.49, 0.68)  | 0.2646               | 1.05 (0.98, 1.13)           | 0.0280               | 1.76 (1.51, 2.02)        | 0.4284               |
| Asian/Pacific Islander                                                  | 0.48 (-0.16, 1.14) |                      | 0.95 (0.44, 1.46)           |                      | 1.38 (-0.38, 3.14)       |                      |
| Black/African American                                                  | 0.17 (-0.33, 0.67) |                      | 0.53 (0.14, 0.91)           |                      | 2.61 (1.27, 3.94)        |                      |
| Education                                                               |                    |                      |                             |                      |                          |                      |
| College degree or higher                                                | 0.70 (0.58, 0.83)  | 0.0003               | 0.98 (0.88, 1.08)           | 0.0348               | 1.69 (1.35, 2.03)        | 0.2502               |
| School after high school                                                | 0.51 (0.36, 0.66)  |                      | 1.03 (0.91, 1.15)           |                      | 1.69 (1.29, 2.09)        |                      |
| High school diploma or less                                             | 0.22 (-0.01, 0.45) |                      | 1.21 (1.03, 1.39)           |                      | 2.20 (1.58, 2.81)        |                      |
| Lives alone                                                             |                    |                      |                             |                      |                          |                      |
| No                                                                      | 0.72 (0.58, 0.86)  | 0.0024               | 1.15 (1.04, 1.25)           | 0.0029               | 1.95 (1.58, 2.31)        | 0.2186               |
| Yes                                                                     | 0.44 (0.32, 0.56)  |                      | 0.94 (0.84, 1.03)           |                      | 1.64 (1.32, 1.96)        |                      |
| Change in living arrangement due to the COVID-19 pandemic               |                    |                      |                             |                      |                          |                      |
| No                                                                      | 0.54 (0.45, 0.64)  | 0.0864               | 0.99 (0.92, 1.07)           | 0.0005               | 1.73 (1.48, 1.98)        | 0.2074               |
| Yes                                                                     | 0.84 (0.51, 1.16)  |                      | 1.45 (1.20, 1.70)           |                      | 2.30 (1.45, 3.16)        |                      |
| Living situation restrictions due to the COVID-19 pandemic              |                    |                      |                             |                      |                          |                      |
| No                                                                      | 0.50 (0.40, 0.60)  | 0.0044               | 1.02 (0.94, 1.09)           | 0.4357               | 1.81 (1.54, 2.08)        | 0.5704               |
| Yes                                                                     | 0.83 (0.63, 1.04)  |                      | 1.09 (0.92, 1.25)           |                      | 1.63 (1.08, 2.18)        |                      |
| Communication with others outside the home                              |                    |                      |                             |                      |                          |                      |
| Every day or several times per week                                     | 0.59 (0.49, 0.69)  | 0.2235               | 1.07 (0.99, 1.14)           | 0.0278               | 1.84 (1.57, 2.11)        | 0.2699               |
| 1-2 times per week, or less                                             | 0.45 (0.26, 0.65)  |                      | 0.87 (0.72, 1.03)           |                      | 1.51 (0.98, 2.04)        |                      |
| Frequency of communication now, compared to before the pandemic         |                    |                      |                             |                      |                          |                      |
| About the same, or more often                                           | 0.53 (0.42, 0.64)  | 0.2131               | 1.02 (0.93, 1.10)           | 0.6290               | 1.90 (1.61, 2.19)        | 0.1159               |
| Less often than before                                                  | 0.65 (0.49, 0.81)  |                      | 1.05 (0.93, 1.18)           |                      | 1.49 (1.05, 1.92)        |                      |
| Ways of staying in touch with others                                    |                    |                      |                             |                      |                          |                      |
| Speaking in person                                                      | 0.61 (0.46, 0.76)  | 0.4302               | 1.08 (0.97, 1.20)           | 0.2165               | 1.96 (1.57, 2.35)        | 0.2388               |
| Telephone, video, social media, email or postal mail, but not in person | 0.54 (0.42, 0.65)  |                      | 0.99 (0.91, 1.08)           |                      | 1.66 (1.36, 1.97)        |                      |
| Walking for at least 5 minutes                                          |                    |                      |                             |                      |                          |                      |
| ≤3 times per week                                                       | 0.53 (0.41, 0.64)  | 0.2841               | 1.02 (0.93, 1.11)           | 0.7657               | 1.58 (1.27, 1.89)        | 0.0434               |
| 4 or more times per week                                                | 0.62 (0.48, 0.77)  |                      | 1.04 (0.93, 1.15)           |                      | 2.08 (1.70, 2.47)        |                      |
| History of depression                                                   |                    |                      |                             |                      |                          |                      |
| No                                                                      | 0.59 (0.50, 0.69)  | 0.0478               | 1.06 (0.99, 1.13)           | 0.0044               | 1.89 (1.63, 2.14)        | 0.0056               |
| Yes                                                                     | 0.29 (0.01, 0.58)  |                      | 0.71 (0.49, 0.94)           |                      | 0.74 (-0.04, 1.51)       |                      |

| Subgroups             | Perceived stress  |                      | Depressive symptoms (CES-D) |                      | Anxiety (PROMIS 4 items) |                      |
|-----------------------|-------------------|----------------------|-----------------------------|----------------------|--------------------------|----------------------|
|                       | Estimate (95% CI) | p-value, Interaction | Estimate (95% CI)           | p-value, Interaction | Estimate (95% CI)        | p-value, Interaction |
| Stressful life events |                   |                      |                             |                      |                          |                      |
| None                  | 0.54 (0.40, 0.67) | 0.5433               | 0.96 (0.86, 1.07)           | 0.0903               | 1.85 (1.49, 2.20)        | 0.5886               |
| 1 or more             | 0.56 (0.47, 0.65) |                      | 1.02 (0.95, 1.09)           |                      | 1.78 (1.54, 2.02)        |                      |

**Footnote.** Estimates are from linear regression models and assess the linear change in each dependent variable with a change of 3 points change in the loneliness score from before the pandemic to during the pandemic.

Analyses for racial subgroups show only those groups with more than 300 participants in the sample who self-identified with that group.

Models include main effects for change in loneliness score and the variables shown in the table, and are further adjusted for education, Hispanic/Latina ethnicity, alcohol intake, and medical history (CVD history, cancer history, and vascular factors risk score).

Each interaction p-value was derived from a model that included an interaction term between change in loneliness score and the potential effect modifier. For evaluating age and education as effect modifiers, the interaction term was between change in loneliness score and linear age and education, respectively.
